# Supplementary material for: Attributable Outcomes of Endemic Clostridium difficile–associated Disease in Nonsurgical Patients
Source: Emerg Infect Dis. 2008 Jul;14(7):1031–8. doi: 10.3201/eid1407.070867 (PMC2600322; doi:10.3201/eid1407.070867)
Supplement: Appendix — Details on ICD-9-CM Codes and Creation of the Propensity Score for Clostridium difficile-associated disease [file 07-0867_appT-s1.pdf]

## **Appendix.**

### **Details on ICD-9-CM Codes and Creation of the Propensity Score for *Clostridium difficile*–associated disease**

#### **Details on ICD-9-CM Codes**

The International Classification of Diseases, 9th edition, Clinical Modification (ICD-9-CM) system of classifying hospital discharge diagnoses and procedures is used throughout the United States. In this study, all coexisting conditions were identified by ICD-9-CM diagnoses codes, and procedures were identified by ICD-9-CM procedure codes. The Deyo adaptation of the Charlson Comorbidity Index was used to identify and classify coexisting conditions (1,2). Medical coders assign ICD-9-CM diagnoses and procedure codes after reviewing medical record documentation.

#### **Creation of the Propensity Score**

The propensity score predicts the probability of developing *Clostridium difficile*–associated disease (CDAD) (from 0 to 1) for each patient in the dataset, with a higher score indicating a higher probability of CDAD’s developing. By matching CDAD case-patients to controls based on propensity score, the association between CDAD and multiple outcomes can be assessed with adjustment for confounding. To calculate the propensity score, all known variables suspected to affect the development of CDAD were included as independent variables in a multivariable logistic regression analysis. Additional variables that significantly affected hospital length of stay or death were included as well. Patient-specific probabilities were generated by a multivariable logistic regression model with CDAD as the dependent variable. The independent variables are presented in the online Appendix Tables 1 and 2.

Some coexisting conditions were classified by the Deyo adaptation of the Charlson Comorbidity Index (1,2). For each patient, a modified APACHE II Acute Physiology Score was calculated to adjust for severity of illness (3).

| propensity score*                                           |                                                       |
|-------------------------------------------------------------|-------------------------------------------------------|
| Variable                                                    | ICD-9-CM code                                         |
| Comorbidities identified by ICD-9-CM diagnoses codes        |                                                       |
| Congestive heart failure (Deyo)                             | 428.0–428.9                                           |
| Cerebrovascular disease (Deyo)                              | 430–438.0                                             |
| Moderate or severe liver disease (Deyo)                     | 572.2–572.8                                           |
| Any malignancy, excluding leukemia and lymphoma (Deyo)      | 140.0–172.9                                           |
| Leukemia or lymphoma (Deyo)                                 | 174.0–195.8                                           |
| Metastatic solid tumor (Deyo)                               | 200.0–208.91                                          |
| Deep venous thrombosis or pulmonary embolism                | 196.0–199.1                                           |
| Cardiac arrest                                              | 415.1–415.11, 453.40–453.9                            |
| Atrial fibrillation                                         | 427.5                                                 |
| Hypertension                                                | 427.31                                                |
| Cystic fibrosis                                             | 401.0–401.9                                           |
| Pleurisy, pneumothorax, or pulmonary collapse               | 277.0–277.09                                          |
| Acute renal failure                                         | 510.0–512.8, 518.0–518.2                              |
| Urinary tract infection or pyelonephritis                   | 584.5–584.9, 586                                      |
| Anemia                                                      | 590.00–590.80, 599.0                                  |
| Neutropenia                                                 | 280.0–282.3, 282.8–285.9                              |
| Convulsions                                                 | 288.0                                                 |
| Depression                                                  | 780.31–780.39                                         |
| Schizophrenia                                               | 311                                                   |
| Episodic mood disorders                                     | 295.00–295.95                                         |
| Adverse drug event or drug overdose                         | 296.00–296.99                                         |
| Vaginal delivery                                            | 960.0–979.9                                           |
| Early or threatened labor                                   | 650, V27.0                                            |
|                                                             | 644.00–644.21                                         |
| Procedures identified by ICD-9-CM procedure codes           |                                                       |
| Insertion, repair, or removal of pacemaker or defibrillator | 00.50–00.54, 37.61–37.99                              |
| Angioplasty or stent placement (coronary and noncoronary)   | 00.55–00.65, 36.01–36.09, 39.50                       |
| Cardiac stress tests, pacemaker, and defibrillator checks   | 89.41–89.49                                           |
| Aneurysm repair                                             | 37.32, 39.51–39.52, 39.71–39.79                       |
| Central venous catheter placement                           | 38.93                                                 |
| Minor surgery or procedures on colon or small intestine     | 46.0–46.99                                            |
| G-tube placement                                            | 43.0–43.19                                            |
| Hemodialysis                                                | 39.95                                                 |
| Chemotherapy                                                | 99.25                                                 |
| Cesarean section                                            | 74.0–74.4, 74.99                                      |
| Medical or surgical complication                            | 996.0–996.59, 996.7–997.3, 998.0–999.9, E87.00–E87.99 |
| Psychiatric somatotherapy                                   | 94.21–94.29                                           |

\*ICD-9, International Classification of Diseases, 9th edition, Clinical Modification.

Appendix Table 2. Other independent variables included in the propensity score, *Clostridium difficile*-associated disease

|                                           |  |
|-------------------------------------------|--|
| Demographic variables                     |  |
| Age                                       |  |
| Race (white or nonwhite)                  |  |
| Sex                                       |  |
| Medication variables                      |  |
| Treatment with gastric acid suppressors   |  |
| Treatment with antidiarrheals             |  |
| Treatment with laxatives                  |  |
| Treatment with narcotics                  |  |
| No. days receiving antifungal             |  |
| No. days receiving antiviral              |  |
| No. days receiving amoxicillin/ampicillin |  |
| No. days receiving metronidazole          |  |
| No. days receiving fluoroquinolone        |  |
| No. days receiving intravenous vancomycin |  |
| No. days receiving macrolide              |  |
| No. days receiving cephalosporins         |  |
| No. days receiving clindamycin            |  |
| Additional variables                      |  |

Modified Acute Physiology Score (3)  
Albumin (>3.5, 2.5–3.5, and <2.5 g/dL)  
No. procedures performed  
Admission to chronic ventilation floor  
No. days in intensive care unit  
Hospital admission in previous 60 days  
Sum *Clostridium difficile*-associated disease pressure (4)

---

## Appendix References

1. Charlson ME, Pompei P, Ales KL, MacKenzie CR. A new method of classifying prognostic comorbidity in longitudinal studies: development and validation. *J Chronic Dis.* 1987;40:373–83.
2. Deyo RA, Cherkin DC, Ciol MA. Adapting a clinical comorbidity index for use with ICD-9-CM administrative databases. *J Clin Epidemiol.* 1992;45:613–9.
3. Knaus WA, Draper EA, Wagner DP, Zimmerman JE. APACHE II: a severity of disease classification system. *Crit Care Med.* 1985;13:818–29.
4. Dubberke ER, Reske KA, Olsen MA, McMullen KM, Mayfield JL, McDonald LC, et al. Evaluation of "CDAD pressure" as a risk factor for *Clostridium difficile*-associated disease. *Arch Intern Med.* 2007;167:1092–7.
